# Supplementary material for: Mechanism of Chronic Kidney Disease Progression and Novel Biomarkers: A Metabolomic Analysis of Experimental Glomerulonephritis
Source: MDPI journal article supplement (doi:10.3390/metabo10040169), 2020-04-24
Supplement: s1 [file s1]

| ESI | Neutral mass (Da) | Mass (m/z) | Retention time (min) | Metabolites | $q < 0.05$         |                      |                      |                       |
|-----|-------------------|------------|----------------------|-------------|--------------------|----------------------|----------------------|-----------------------|
|     |                   |            |                      |             | AN vs CN at Week 1 | CN-C vs CN at Week 4 | CN-C vs CN at Week 8 | CN-C vs CN at Week 12 |
| POS | -                 | 115.0378   | 1.08                 | -           | x                  |                      | x                    | x                     |
| NEG | 311.9745          | 332.9501   | 1.15                 | -           | x                  |                      | x                    |                       |
| NEG | 192.0261          | 191.0185   | 1.18                 | -           | x                  |                      | x                    |                       |
| NEG | 130.0255          | 111.0076   | 1.18                 | -           | x                  |                      | x                    |                       |
| NEG | 86.0360           | 85.0287    | 1.18                 | -           | x                  |                      | x                    |                       |
| POS | -                 | 215.0175   | 1.18                 | -           | x                  |                      | x                    |                       |
| POS | -                 | 216.0245   | 1.18                 | -           | x                  |                      | x                    |                       |
| POS | -                 | 407.0327   | 1.18                 | -           | x                  |                      | x                    |                       |
| NEG | -                 | 87.0080    | 1.19                 | -           | x                  |                      | x                    |                       |
| NEG | -                 | 154.9979   | 1.19                 | -           | x                  |                      | x                    |                       |
| POS | -                 | 122.0146   | 1.19                 | -           | x                  |                      | x                    |                       |
| NEG | -                 | 249.0060   | 1.21                 | -           | x                  |                      | x                    |                       |
| POS | -                 | 248.1543   | 1.21                 | -           | x                  |                      | x                    |                       |
| POS | -                 | 423.0084   | 1.21                 | -           | x                  |                      | x                    |                       |
| NEG | -                 | 263.0225   | 1.39                 | -           | x                  |                      | x                    |                       |
| POS | -                 | 330.9951   | 1.40                 | -           | x                  |                      | x                    |                       |
| POS | -                 | 113.0245   | 1.50                 | -           | x                  |                      | x                    |                       |
| POS | -                 | 197.0675   | 1.52                 | -           | x                  | x                    |                      |                       |
| POS | -                 | 174.1241   | 1.56                 | -           | x                  |                      | x                    |                       |
| NEG | -                 | 129.0185   | 1.83                 | -           | x                  |                      | x                    |                       |
| NEG | -                 | 222.9905   | 1.83                 | -           | x                  |                      | x                    |                       |
| NEG | 225.9479          | 270.9496   | 1.85                 | -           | x                  |                      | x                    |                       |
| NEG | -                 | 85.0287    | 1.85                 | -           | x                  |                      | x                    |                       |
| NEG | -                 | 336.9210   | 1.88                 | -           | x                  |                      | x                    |                       |
| NEG | -                 | 205.0336   | 2.31                 | -           | x                  |                      | x                    |                       |
| NEG | -                 | 204.9807   | 2.51                 | -           | x                  |                      |                      | x                     |
| POS | -                 | 124.0760   | 2.82                 | -           | x                  |                      | x                    |                       |
| NEG | -                 | 188.9854   | 3.05                 | -           | x                  |                      | x                    |                       |
| NEG | -                 | 321.0391   | 3.16                 | -           | x                  |                      | x                    | x                     |
| POS | -                 | 367.0218   | 3.16                 | -           | x                  |                      | x                    |                       |
| POS | -                 | 158.0816   | 3.37                 | -           | x                  |                      |                      | x                     |
| POS | -                 | 120.0449   | 3.39                 | -           | x                  |                      | x                    | x                     |
| NEG | -                 | 154.0240   | 4.03                 | -           | x                  |                      | x                    |                       |
| POS | -                 | 127.0362   | 4.23                 | -           | x                  |                      | x                    |                       |
| NEG | -                 | 216.9803   | 4.26                 | -           | x                  |                      | x                    | x                     |
| NEG | -                 | 127.0756   | 4.30                 | -           | x                  |                      | x                    |                       |
| NEG | -                 | 137.0233   | 4.34                 | -           | x                  |                      | x                    |                       |
| NEG | -                 | 182.0212   | 4.44                 | -           | x                  |                      | x                    | x                     |

|     |          |          |      |   |   |   |   |   |
|-----|----------|----------|------|---|---|---|---|---|
| NEG | -        | 197.0445 | 4.51 | - | X |   | X | X |
| NEG | -        | 224.0552 | 4.52 | - | X |   | X |   |
| NEG | -        | 336.9649 | 4.52 | - | X |   | X |   |
| POS | -        | 160.0763 | 4.52 | - | X |   | X |   |
| POS | 191.0947 | 174.0914 | 4.65 | - | X |   | X |   |
| NEG | -        | 249.0027 | 4.91 | - | X |   | X |   |
| POS | -        | 280.1510 | 4.98 | - | X | X |   |   |
| NEG | -        | 278.0694 | 5.00 | - | X |   | X |   |
| POS | -        | 280.1548 | 5.00 | - | X | X | X |   |
| NEG | 249.0644 | 270.0404 | 5.02 | - | X |   | X | X |
| POS | -        | 143.0404 | 5.02 | - | X |   | X |   |
| POS | -        | 402.1673 | 5.07 | - | X |   | X |   |
| NEG | 172.1091 | 153.0913 | 5.15 | - | X |   |   | X |
| POS | -        | 239.0898 | 5.17 | - | X |   | X |   |
| NEG | -        | 313.0715 | 5.33 | - | X |   | X |   |
| NEG | -        | 258.9913 | 5.42 | - | X |   | X |   |
| POS | -        | 229.1086 | 5.48 | - | X |   | X |   |
| POS | 179.0585 | 162.0552 | 5.53 | - | X | X | X | X |
| NEG | -        | 331.9513 | 5.59 | - | X |   | X |   |
| POS | -        | 302.1948 | 5.66 | - | X | X |   | X |
| POS | -        | 319.1652 | 5.69 | - | X | X | X | X |
| POS | -        | 151.0762 | 5.77 | - | X |   | X |   |
| POS | 227.1527 | 210.1495 | 5.80 | - | X |   | X |   |
| POS | -        | 135.1167 | 5.80 | - | X |   | X |   |
| NEG | -        | 179.0649 | 5.81 | - | X |   | X | X |
| POS | -        | 182.1283 | 5.87 | - | X |   |   | X |
| POS | -        | 332.0920 | 5.88 | - | X |   |   | X |
| POS | -        | 136.0416 | 5.90 | - | X | X |   |   |
| NEG | -        | 296.0925 | 5.95 | - | X |   | X |   |
| POS | -        | 213.1162 | 5.97 | - | X |   | X |   |
| POS | -        | 123.0812 | 5.97 | - | X |   |   | X |
| POS | -        | 181.0874 | 5.97 | - | X |   | X |   |
| POS | -        | 259.1022 | 5.97 | - | X |   | X |   |
| NEG | -        | 281.0595 | 6.01 | - | X |   | X |   |
| POS | -        | 116.0711 | 6.03 | - | X |   | X |   |
| NEG | 416.0846 | 415.0773 | 6.12 | - | X |   | X |   |
| NEG | -        | 295.1288 | 6.12 | - | X |   | X |   |
| NEG | -        | 253.1184 | 6.12 | - | X |   | X | X |
| NEG | -        | 613.2490 | 6.12 | - | X |   | X |   |
| NEG | -        | 379.0806 | 6.13 | - | X |   | X |   |

|     |          |          |      |   |   |   |   |
|-----|----------|----------|------|---|---|---|---|
| POS | -        | 381.1515 | 6.14 | - | X |   | X |
| POS | -        | 295.1134 | 6.14 | - | X |   | X |
| POS | -        | 150.0780 | 6.16 | - | X |   | X |
| POS | -        | 283.1120 | 6.16 | - | X |   | X |
| NEG | 151.0626 | 150.0553 | 6.17 | - | X |   | X |
| NEG | 210.0896 | 255.0878 | 6.31 | - | X |   | X |
| POS | -        | 249.1067 | 6.31 | - | X |   | X |
| POS | -        | 251.1295 | 6.31 | - | X |   | X |
| NEG | -        | 375.1302 | 6.32 | - | X |   | X |
| NEG | -        | 195.1008 | 6.34 | - | X |   | X |
| POS | 262.0831 | 263.0903 | 6.35 | - | X |   | X |
| POS | -        | 284.1867 | 6.41 | - | X |   | X |
| POS | -        | 359.1827 | 6.41 | - | X |   | X |
| POS | -        | 344.2084 | 6.41 | - | X |   | X |
| POS | -        | 465.2202 | 6.45 | - | X | X |   |
| NEG | 128.0821 | 127.0754 | 6.47 | - | X | X | X |
| POS | -        | 155.0720 | 6.47 | - | X |   | X |
| NEG | 163.0281 | 184.0038 | 6.50 | - | X |   | X |
| NEG | -        | 331.0420 | 6.50 | - | X |   | X |
| NEG | -        | 155.0689 | 6.52 | - | X |   | X |
| NEG | 163.0625 | 162.0547 | 6.53 | - | X |   | X |
| NEG | -        | 323.1017 | 6.53 | - | X |   | X |
| NEG | -        | 215.1283 | 6.61 | - | X |   | X |
| POS | -        | 123.0805 | 6.61 | - | X |   | X |
| POS | -        | 125.0602 | 6.63 | - | X |   | X |
| POS | -        | 284.1208 | 6.63 | - | X |   | X |
| NEG | 205.0737 | 204.0665 | 6.65 | - | X |   | X |
| NEG | -        | 109.0285 | 6.65 | - | X |   | X |
| NEG | -        | 116.0496 | 6.65 | - | X |   | X |
| POS | -        | 299.0863 | 6.65 | - | X |   | X |
| POS | -        | 403.2106 | 6.65 | - | X |   | X |
| NEG | -        | 158.0601 | 6.67 | - | X |   | X |
| POS | -        | 329.2143 | 6.68 | - | X |   | X |
| POS | -        | 387.2140 | 6.68 | - | X |   | X |
| POS | -        | 381.1865 | 6.69 | - | X |   | X |
| POS | -        | 491.1695 | 6.69 | - | X |   | X |
| NEG | -        | 193.0489 | 6.74 | - | X |   | X |
| POS | 148.0883 | 149.0963 | 6.75 | - | X |   | X |
| POS | -        | 241.0749 | 6.75 | - | X |   | X |
| POS | -        | 225.1104 | 6.75 | - | X |   | X |

|     |          |          |      |   |   |   |   |   |
|-----|----------|----------|------|---|---|---|---|---|
| NEG | -        | 135.0076 | 6.78 | - | X |   | X |   |
| POS | -        | 323.1041 | 6.79 | - | X |   | X |   |
| POS | -        | 326.1077 | 6.83 | - | X |   | X |   |
| NEG | -        | 655.1839 | 6.85 | - | X |   | X |   |
| NEG | 216.0983 | 237.0736 | 6.86 | - | X |   | X |   |
| POS | 206.0946 | 207.0994 | 6.89 | - | X |   | X |   |
| POS | -        | 111.0807 | 6.89 | - | X |   | X |   |
| POS | -        | 285.1254 | 6.90 | - | X |   | X |   |
| POS | -        | 257.0767 | 6.93 | - | X |   |   | X |
| POS | -        | 344.2434 | 6.93 | - | X |   | X | X |
| POS | -        | 387.2084 | 6.97 | - | X |   | X | X |
| POS | -        | 273.1070 | 6.97 | - | X |   | X |   |
| POS | -        | 387.2105 | 6.98 | - | X |   | X |   |
| POS | -        | 239.0612 | 7.01 | - | X |   | X |   |
| POS | -        | 181.0236 | 7.01 | - | X |   | X |   |
| NEG | 160.1088 | 159.1014 | 7.02 | - | X |   | X |   |
| NEG | 264.1011 | 263.0930 | 7.02 | - | X |   | X |   |
| POS | -        | 132.9971 | 7.02 | - | X |   | X |   |
| POS | -        | 165.0205 | 7.02 | - | X |   | X |   |
| POS | -        | 283.1018 | 7.02 | - | X |   | X |   |
| POS | -        | 190.0176 | 7.02 | - | X |   | X |   |
| NEG | 146.0933 | 127.0755 | 7.04 | - | X |   | X |   |
| NEG | 232.1269 | 253.1073 | 7.04 | - | X |   | X |   |
| POS | -        | 319.1268 | 7.08 | - | X |   | X | X |
| POS | -        | 239.1266 | 7.11 | - | X |   | X |   |
| POS | -        | 261.1099 | 7.11 | - | X |   |   | X |
| POS | -        | 229.0817 | 7.12 | - | X |   |   | X |
| NEG | -        | 155.0688 | 7.23 | - | X |   | X |   |
| POS | -        | 368.1171 | 7.23 | - | X |   | X |   |
| NEG | -        | 153.0912 | 7.24 | - | X |   | X |   |
| POS | 152.0848 | 135.0815 | 7.24 | - | X |   | X |   |
| POS | 180.0799 | 181.0850 | 7.24 | - | X | X | X |   |
| POS | -        | 449.2116 | 7.24 | - | X |   | X |   |
| POS | -        | 191.1040 | 7.24 | - | X |   | X |   |
| POS | -        | 237.0443 | 7.24 | - | X | X |   |   |
| NEG | -        | 205.0499 | 7.26 | - | X |   | X |   |
| POS | -        | 330.2256 | 7.27 | - | X | X | X | X |
| POS | -        | 293.1383 | 7.27 | - | X | X | X |   |
| NEG | 173.1024 | 218.1018 | 7.30 | - | X |   | X |   |
| POS | -        | 109.1018 | 7.30 | - | X |   | X |   |

|     |          |          |      |   |   |   |   |   |
|-----|----------|----------|------|---|---|---|---|---|
| NEG | -        | 287.1476 | 7.31 | - | X |   | X |   |
| POS | 150.1049 | 151.1122 | 7.31 | - | X |   | X | X |
| POS | -        | 259.1310 | 7.31 | - | X |   | X |   |
| NEG | -        | 169.1218 | 7.33 | - | X |   | X |   |
| POS | 194.0925 | 217.0812 | 7.33 | - | X |   | X |   |
| POS | -        | 195.1041 | 7.33 | - | X |   | X |   |
| POS | -        | 237.1127 | 7.33 | - | X |   | X | X |
| POS | -        | 232.0889 | 7.34 | - | X |   | X |   |
| POS | -        | 473.2284 | 7.34 | - | X |   | X |   |
| POS | -        | 242.1213 | 7.41 | - | X | X |   |   |
| NEG | -        | 175.0963 | 7.42 | - | X |   | X |   |
| NEG | -        | 279.1340 | 7.45 | - | X |   | X |   |
| NEG | -        | 273.1692 | 7.46 | - | X |   | X |   |
| POS | -        | 137.0973 | 7.48 | - | X |   | X |   |
| POS | -        | 149.0972 | 7.49 | - | X |   | X |   |
| POS | -        | 291.1208 | 7.49 | - | X | X | X | X |
| POS | -        | 358.2569 | 7.51 | - | X |   |   | X |
| POS | -        | 193.0872 | 7.51 | - | X | X | X |   |
| POS | -        | 422.2488 | 7.52 | - | X |   | X |   |
| NEG | -        | 429.1936 | 7.57 | - | X |   |   | X |
| POS | -        | 389.2310 | 7.57 | - | X |   | X |   |
| NEG | -        | 185.1168 | 7.59 | - | X |   | X | X |
| POS | 226.1187 | 227.1260 | 7.59 | - | X |   | X |   |
| NEG | -        | 427.1777 | 7.60 | - | X |   | X |   |
| POS | -        | 109.1019 | 7.60 | - | X |   |   | X |
| POS | -        | 476.2539 | 7.60 | - | X |   | X |   |
| POS | -        | 153.0902 | 7.62 | - | X |   | X |   |
| POS | -        | 221.1189 | 7.62 | - | X |   | X | X |
| POS | -        | 460.1405 | 7.62 | - | X |   | X |   |
| POS | -        | 295.1780 | 7.62 | - | X |   | X |   |
| NEG | 154.0982 | 153.0908 | 7.63 | - | X |   | X |   |
| NEG | -        | 219.0633 | 7.63 | - | X |   | X |   |
| POS | -        | 475.2462 | 7.63 | - | X |   | X |   |
| NEG | -        | 191.0329 | 7.66 | - | X |   | X |   |
| NEG | -        | 443.1734 | 7.69 | - | X |   | X | X |
| POS | -        | 381.1602 | 7.69 | - | X |   | X |   |
| NEG | -        | 511.1591 | 7.70 | - | X |   | X | X |
| POS | -        | 477.2557 | 7.70 | - | X |   | X |   |
| POS | -        | 289.1395 | 7.70 | - | X |   |   | X |
| POS | -        | 175.1123 | 7.73 | - | X |   | X |   |

|     |          |          |      |   |   |   |   |   |
|-----|----------|----------|------|---|---|---|---|---|
| POS | -        | 193.1250 | 7.74 | - | X | X |   | X |
| NEG | -        | 137.0956 | 7.75 | - | X |   | X |   |
| POS | 270.1434 | 293.1370 | 7.75 | - | X |   |   | X |
| POS | -        | 294.1467 | 7.75 | - | X |   | X |   |
| NEG | 158.1316 | 203.1280 | 7.78 | - | X | X | X |   |
| NEG | -        | 211.0958 | 7.78 | - | X | X |   |   |
| POS | -        | 257.1069 | 7.78 | - | X |   | X | X |
| NEG | 204.1350 | 185.1171 | 7.79 | - | X |   | X |   |
| POS | -        | 257.1152 | 7.79 | - | X |   | X |   |
| POS | -        | 141.1282 | 7.79 | - | X |   | X | X |
| POS | -        | 475.2464 | 7.79 | - | X |   | X |   |
| POS | -        | 227.1265 | 7.79 | - | X |   | X |   |
| NEG | -        | 459.1677 | 7.81 | - | X |   | X | X |
| POS | -        | 225.0874 | 7.81 | - | X |   | X |   |
| POS | -        | 189.1258 | 7.81 | - | X |   |   | X |
| POS | -        | 215.1000 | 7.82 | - | X |   | X |   |
| POS | -        | 221.1174 | 7.82 | - | X |   | X |   |
| POS | -        | 307.1182 | 7.85 | - | X |   | X |   |
| POS | -        | 371.2143 | 7.85 | - | X |   | X |   |
| NEG | 114.1038 | 113.0965 | 7.86 | - | X |   | X |   |
| POS | -        | 309.1669 | 7.86 | - | X | X | X |   |
| NEG | -        | 323.1155 | 7.88 | - | X |   |   | X |
| POS | -        | 137.0978 | 7.88 | - | X |   | X |   |
| POS | -        | 309.1576 | 7.88 | - | X |   | X |   |
| POS | -        | 298.1479 | 7.88 | - | X |   | X |   |
| POS | -        | 271.0874 | 7.88 | - | X |   | X |   |
| NEG | -        | 155.1090 | 7.90 | - | X |   | X |   |
| NEG | -        | 497.1806 | 7.90 | - | X |   |   | X |
| POS | -        | 201.0919 | 7.90 | - | X |   | X |   |
| POS | -        | 267.1195 | 7.90 | - | X |   | X |   |
| POS | -        | 306.1382 | 7.90 | - | X |   | X |   |
| POS | -        | 288.1133 | 7.92 | - | X | X |   |   |
| NEG | -        | 209.1176 | 7.95 | - | X |   | X |   |
| POS | -        | 133.1037 | 7.95 | - | X |   | X |   |
| NEG | -        | 243.1215 | 7.96 | - | X |   | X |   |
| POS | -        | 147.0831 | 7.96 | - | X |   | X |   |
| POS | -        | 387.2076 | 7.96 | - | X |   | X | X |
| POS | -        | 133.1020 | 7.96 | - | X |   | X | X |
| NEG | -        | 181.0853 | 7.97 | - | X |   |   | X |
| POS | -        | 393.2207 | 7.97 | - | X |   | X |   |

|     |          |          |      |   |   |   |   |   |
|-----|----------|----------|------|---|---|---|---|---|
| POS | 234.0913 | 257.0761 | 7.99 | - | X |   | X |   |
| POS | 254.0584 | 255.0657 | 7.99 | - | X |   | X |   |
| POS | -        | 239.0597 | 7.99 | - | X | X | X |   |
| POS | -        | 109.1018 | 7.99 | - | X |   | X |   |
| POS | -        | 195.0705 | 7.99 | - | X |   | X |   |
| POS | -        | 339.0174 | 7.99 | - | X |   | X |   |
| POS | -        | 371.1369 | 8.00 | - | X | X |   |   |
| POS | -        | 137.0958 | 8.00 | - | X |   | X |   |
| POS | -        | 188.0373 | 8.00 | - | X |   | X |   |
| NEG | -        | 223.1341 | 8.02 | - | X |   | X |   |
| POS | 252.1335 | 275.1247 | 8.02 | - | X | X | X | X |
| NEG | -        | 251.1267 | 8.06 | - | X |   | X |   |
| POS | 240.1347 | 263.1212 | 8.06 | - | X | X |   |   |
| POS | -        | 274.0952 | 8.08 | - | X |   | X |   |
| NEG | -        | 299.0563 | 8.10 | - | X |   | X |   |
| POS | -        | 327.1635 | 8.10 | - | X |   | X | X |
| POS | -        | 237.1496 | 8.11 | - | X |   | X |   |
| POS | -        | 327.1724 | 8.12 | - | X |   | X |   |
| NEG | -        | 648.1454 | 8.14 | - | X |   | X |   |
| POS | 298.1257 | 321.1109 | 8.14 | - | X |   | X |   |
| POS | -        | 355.0523 | 8.14 | - | X |   | X |   |
| POS | -        | 121.1013 | 8.14 | - | X |   | X | X |
| POS | -        | 107.0500 | 8.15 | - | X |   | X |   |
| POS | -        | 257.1229 | 8.19 | - | X |   | X |   |
| POS | -        | 243.1010 | 8.19 | - | X |   | X |   |
| POS | -        | 149.0614 | 8.21 | - | X |   | X |   |
| POS | -        | 123.0448 | 8.21 | - | X |   | X |   |
| POS | -        | 133.0653 | 8.21 | - | X |   | X |   |
| POS | -        | 343.1499 | 8.24 | - | X |   | X |   |
| NEG | -        | 139.1120 | 8.26 | - | X |   | X |   |
| POS | -        | 247.0959 | 8.28 | - | X | X |   | X |
| POS | -        | 139.1118 | 8.28 | - | X |   | X | X |
| POS | -        | 373.1937 | 8.29 | - | X |   | X |   |
| NEG | -        | 229.0167 | 8.32 | - | X |   | X |   |
| POS | -        | 333.1186 | 8.32 | - | X |   |   | X |
| POS | -        | 287.1271 | 8.33 | - | X |   |   | X |
| POS | -        | 135.1173 | 8.35 | - | X |   | X |   |
| POS | -        | 270.1463 | 8.35 | - | X | X |   |   |
| POS | -        | 123.0813 | 8.36 | - | X |   | X |   |
| POS | -        | 107.0861 | 8.36 | - | X | X |   |   |

|     |          |          |      |   |   |   |   |   |
|-----|----------|----------|------|---|---|---|---|---|
| POS | -        | 323.1792 | 8.36 | - | X | X |   |   |
| NEG | -        | 247.0950 | 8.37 | - | X |   | X |   |
| NEG | -        | 169.1223 | 8.37 | - | X |   | X | X |
| POS | -        | 145.1021 | 8.37 | - | X |   | X |   |
| POS | -        | 153.1278 | 8.37 | - | X | X |   |   |
| POS | -        | 163.1119 | 8.39 | - | X |   | X |   |
| NEG | -        | 225.1121 | 8.40 | - | X |   | X |   |
| NEG | -        | 151.1119 | 8.40 | - | X |   | X |   |
| NEG | -        | 163.1112 | 8.40 | - | X |   | X |   |
| NEG | -        | 293.1017 | 8.40 | - | X |   | X |   |
| NEG | -        | 213.1129 | 8.40 | - | X |   | X |   |
| POS | -        | 379.2408 | 8.40 | - | X |   | X |   |
| POS | -        | 237.1156 | 8.40 | - | X |   | X |   |
| POS | -        | 237.1118 | 8.40 | - | X |   | X |   |
| POS | -        | 167.1038 | 8.40 | - | X |   | X |   |
| POS | -        | 395.2411 | 8.40 | - | X |   | X |   |
| POS | -        | 137.0950 | 8.40 | - | X |   |   | X |
| POS | 166.0992 | 149.0959 | 8.41 | - | X |   | X | X |
| POS | -        | 149.0927 | 8.41 | - | X |   | X |   |
| POS | -        | 137.0967 | 8.41 | - | X |   | X |   |
| NEG | -        | 361.2011 | 8.44 | - | X |   | X | X |
| POS | -        | 323.1748 | 8.44 | - | X |   | X |   |
| POS | -        | 325.1974 | 8.44 | - | X |   |   | X |
| NEG | -        | 363.1808 | 8.45 | - | X |   | X | X |
| POS | 384.1915 | 385.1988 | 8.45 | - | X |   | X | X |
| POS | -        | 363.2166 | 8.45 | - | X |   | X | X |
| POS | -        | 345.2021 | 8.45 | - | X |   | X |   |
| POS | -        | 303.1503 | 8.48 | - | X |   | X |   |
| POS | -        | 401.2824 | 8.48 | - | X |   | X |   |
| NEG | 252.1348 | 251.1275 | 8.50 | - | X |   | X |   |
| NEG | 272.1359 | 293.1397 | 8.51 | - | X |   | X | X |
| NEG | -        | 307.1210 | 8.51 | - | X |   | X |   |
| POS | -        | 387.2185 | 8.51 | - | X |   | X |   |
| NEG | -        | 361.1281 | 8.52 | - | X |   | X | X |
| NEG | -        | 225.0732 | 8.52 | - | X |   |   | X |
| POS | 276.1319 | 277.1421 | 8.52 | - | X | X | X | X |
| POS | -        | 333.1645 | 8.52 | - | X |   | X |   |
| POS | -        | 317.1386 | 8.54 | - | X |   | X |   |
| NEG | 224.1405 | 223.1332 | 8.58 | - | X |   | X | X |
| POS | -        | 341.1502 | 8.59 | - | X |   |   | X |



|     |          |          |      |   |   |   |   |   |
|-----|----------|----------|------|---|---|---|---|---|
| NEG | -        | 339.1258 | 8.62 | - | X | X | X | X |
| POS | -        | 293.1380 | 8.62 | - | X |   | X |   |
| NEG | -        | 225.1486 | 8.63 | - | X |   | X |   |
| NEG | -        | 389.0924 | 8.63 | - | X |   | X |   |
| NEG | 238.1555 | 237.1482 | 8.66 | - | X |   | X |   |
| NEG | 292.1872 | 273.1693 | 8.68 | - | X |   | X |   |
| NEG | 348.1911 | 347.1833 | 8.68 | - | X |   | X |   |
| NEG | 258.1801 | 257.1728 | 8.68 | - | X |   | X |   |
| NEG | -        | 315.1956 | 8.68 | - | X |   | X |   |
| NEG | -        | 383.1829 | 8.68 | - | X |   | X |   |
| POS | -        | 297.1730 | 8.68 | - | X |   | X | X |
| POS | -        | 383.1893 | 8.68 | - | X |   | X |   |
| POS | -        | 361.1999 | 8.68 | - | X |   | X | X |
| POS | -        | 445.1599 | 8.68 | - | X |   |   | X |
| POS | -        | 281.1725 | 8.68 | - | X |   | X |   |
| POS | -        | 337.1692 | 8.68 | - | X |   |   | X |
| NEG | -        | 427.1771 | 8.69 | - | X |   | X |   |
| POS | -        | 293.1745 | 8.69 | - | X | X |   |   |
| NEG | -        | 405.1875 | 8.70 | - | X |   | X | X |
| POS | -        | 451.1777 | 8.70 | - | X |   | X | X |
| NEG | 476.2214 | 497.1809 | 8.72 | - | X |   | X |   |
| NEG | -        | 331.1145 | 8.72 | - | X |   | X |   |
| NEG | -        | 247.0942 | 8.73 | - | X |   | X |   |
| NEG | -        | 359.1151 | 8.74 | - | X |   | X | X |
| POS | -        | 347.1290 | 8.76 | - | X |   | X | X |
| POS | -        | 263.1602 | 8.76 | - | X |   |   | X |
| NEG | 216.1344 | 237.1103 | 8.77 | - | X |   | X | X |
| NEG | -        | 153.1268 | 8.77 | - | X |   | X |   |
| NEG | -        | 379.2081 | 8.77 | - | X |   | X |   |
| NEG | -        | 340.1545 | 8.77 | - | X | X | X |   |
| NEG | -        | 231.1020 | 8.80 | - | X |   |   | X |
| POS | -        | 295.1539 | 8.80 | - | X | X | X |   |
| POS | -        | 277.1381 | 8.81 | - | X |   | X |   |
| POS | -        | 257.1575 | 8.81 | - | X |   | X | X |
| NEG | -        | 267.1585 | 8.83 | - | X |   | X |   |
| POS | 276.1339 | 299.1257 | 8.83 | - | X |   | X |   |
| POS | -        | 291.1558 | 8.83 | - | X |   | X |   |
| POS | -        | 231.1355 | 8.83 | - | X |   | X |   |
| POS | -        | 317.1367 | 8.83 | - | X | X | X |   |
| POS | -        | 279.1529 | 8.84 | - | X |   | X |   |

|     |          |          |      |   |   |   |   |   |
|-----|----------|----------|------|---|---|---|---|---|
| POS | -        | 169.1044 | 8.84 | - | X |   | X | X |
| NEG | -        | 361.1981 | 8.85 | - | X |   | X |   |
| NEG | -        | 291.1258 | 8.87 | - | X |   | X |   |
| POS | -        | 345.1952 | 8.87 | - | X |   | X | X |
| NEG | -        | 269.1374 | 8.88 | - | X | X | X | X |
| NEG | -        | 399.1451 | 8.90 | - | X |   | X |   |
| POS | -        | 179.1440 | 8.90 | - | X |   |   | X |
| NEG | 248.1068 | 293.1078 | 8.94 | - | X |   |   | X |
| NEG | -        | 198.1127 | 8.94 | - | X |   | X | X |
| POS | -        | 270.1126 | 8.94 | - | X |   | X |   |
| POS | -        | 292.0984 | 8.95 | - | X |   | X |   |
| POS | -        | 401.2900 | 8.98 | - | X |   | X | X |
| NEG | -        | 183.1372 | 9.01 | - | X |   | X |   |
| NEG | 228.1354 | 249.1100 | 9.03 | - | X |   | X | X |
| POS | 322.2187 | 345.2020 | 9.10 | - | X | X | X |   |
| POS | -        | 345.1982 | 9.10 | - | X |   | X |   |
| POS | -        | 349.2293 | 9.18 | - | X |   | X |   |
| NEG | -        | 459.2046 | 9.21 | - | X |   | X |   |
| POS | -        | 354.1380 | 9.23 | - | X |   | X |   |
| NEG | -        | 293.1413 | 9.24 | - | X | X | X | X |
| POS | -        | 235.1321 | 9.27 | - | X |   | X |   |
| POS | -        | 383.2804 | 9.27 | - | X |   | X | X |
| NEG | -        | 363.2168 | 9.29 | - | X |   | X | X |
| NEG | -        | 431.2039 | 9.29 | - | X |   | X | X |
| POS | 346.2148 | 347.2217 | 9.29 | - | X |   | X | X |
| POS | -        | 269.1803 | 9.29 | - | X |   |   | X |
| POS | -        | 352.1209 | 9.31 | - | X |   | X |   |
| POS | -        | 293.1817 | 9.31 | - | X |   | X | X |
| POS | -        | 387.2141 | 9.31 | - | X |   | X | X |
| NEG | -        | 379.1760 | 9.34 | - | X |   | X |   |
| NEG | -        | 345.2122 | 9.34 | - | X |   | X |   |
| NEG | 423.1710 | 422.1637 | 9.35 | - | X |   | X |   |
| POS | -        | 446.1653 | 9.35 | - | X |   | X |   |
| NEG | -        | 341.1059 | 9.36 | - | X | X | X | X |
| NEG | -        | 229.0169 | 9.36 | - | X |   | X |   |
| NEG | -        | 413.1960 | 9.42 | - | X |   |   | X |
| NEG | -        | 343.0851 | 9.42 | - | X |   | X |   |
| NEG | 450.1981 | 495.1895 | 9.46 | - | X |   | X |   |
| NEG | -        | 501.2091 | 9.46 | - | X |   | X |   |
| NEG | -        | 433.2199 | 9.46 | - | X |   | X |   |

|     |          |          |       |               |   |   |   |   |
|-----|----------|----------|-------|---------------|---|---|---|---|
| POS | -        | 405.1960 | 9.46  | -             | x |   | x |   |
| POS | -        | 275.1619 | 9.61  | -             | x |   | x |   |
| NEG | -        | 354.1359 | 9.72  | -             | x |   | x |   |
| POS | -        | 355.1491 | 9.73  | -             | x |   | x | x |
| NEG | -        | 455.1701 | 9.91  | -             | x |   | x |   |
| NEG | -        | 387.1820 | 9.94  | -             | x |   | x |   |
| POS | -        | 359.1845 | 9.98  | -             | x |   | x |   |
| POS | -        | 349.2350 | 10.00 | -             | x |   | x |   |
| NEG | -        | 385.1681 | 10.08 | -             | x |   | x |   |
| NEG | -        | 265.1438 | 10.12 | -             | x |   | x | x |
| NEG | -        | 333.1701 | 10.16 | -             | x |   | x | x |
| POS | 346.2495 | 347.2220 | 10.16 | -             | x |   | x |   |
| POS | -        | 298.1335 | 10.46 | -             | x |   | x |   |
| POS | 440.3638 | 423.3605 | 10.55 | -             | x |   | x |   |
| NEG | -        | 313.2379 | 10.74 | DiHOME        | x |   |   |   |
| NEG | -        | 293.2109 | 11.05 | -             | x |   | x |   |
| NEG | 296.2345 | 295.2271 | 11.32 | EpOME         | x |   | x |   |
| NEG | -        | 363.2146 | 11.32 | -             | x |   | x |   |
| POS | -        | 339.1931 | 11.36 | -             | x |   |   | x |
| POS | -        | 317.2080 | 11.36 | roxyretinoic  | x |   |   | x |
| POS | -        | 341.2092 | 11.48 | -             | x | x | x | x |
| POS | 296.2341 | 319.2236 | 11.66 | EpETE         | x |   | x | x |
| POS | -        | 321.1830 | 12.02 | -             | x |   | x | x |
| POS | -        | 297.1812 | 12.06 | -             | x |   | x |   |
| NEG | -        | 301.2165 | 12.24 | -             | x |   | x | x |
| POS | -        | 357.1531 | 12.24 | -             | x |   |   | x |
| POS | -        | 341.1788 | 12.24 | -             | x |   | x |   |
| POS | -        | 347.1954 | 12.24 | -             | x |   | x | x |
| POS | -        | 623.4025 | 12.25 | -             | x |   | x | x |
| NEG | -        | 277.2163 | 12.27 | -Linolenic ac | x |   | x | x |
| NEG | -        | 345.2040 | 12.27 | -             | x |   | x | x |
| NEG | -        | 475.1619 | 12.27 | -             | x |   | x |   |
| NEG | -        | 407.1743 | 12.27 | -             | x |   | x |   |
| POS | 368.1642 | 333.1504 | 12.27 | -             | x |   | x |   |
| POS | 278.2248 | 279.2321 | 12.27 | -Linolenic ac | x |   | x | x |
| POS | -        | 691.3913 | 12.27 | -             | x |   |   | x |
| POS | -        | 225.0430 | 12.27 | -             | x |   | x | x |
| POS | -        | 617.3866 | 12.27 | -             | x |   | x | x |
| POS | -        | 137.1334 | 12.27 | -             | x |   |   | x |
| POS | -        | 123.1168 | 12.27 | -             | x |   | x | x |

|     |          |          |       |   |   |   |   |
|-----|----------|----------|-------|---|---|---|---|
| POS | -        | 317.1790 | 12.27 | - | X | X |   |
| POS | -        | 323.1963 | 12.27 | - | X | X |   |
| POS | 350.2206 | 351.2279 | 12.46 | - | X | X | X |
| POS | -        | 435.1817 | 12.46 | - | X | X | X |
| POS | -        | 329.2514 | 12.46 | - | X | X | X |
| POS | 280.2415 | 263.2370 | 12.51 | - | X | X | X |
| POS | 150.1054 | 133.1021 | 12.51 | - | X | X | X |
| POS | 178.1370 | 161.1337 | 12.51 | - | X |   | X |
| POS | -        | 135.1169 | 12.51 | - | X | X | X |
| POS | -        | 599.4339 | 12.51 | - | X | X |   |
| POS | -        | 387.1818 | 12.51 | - | X | X |   |
| POS | -        | 627.4327 | 12.51 | - | X | X |   |
| POS | -        | 325.2116 | 12.51 | - | X | X |   |
| POS | -        | 179.1802 | 12.51 | - | X | X | X |
| NEG | -        | 279.2319 | 12.53 | - | X | X | X |
| NEG | -        | 379.1574 | 12.53 | - | X | X | X |
| NEG | -        | 581.4549 | 12.53 | - | X | X | X |
| NEG | -        | 409.1902 | 12.53 | - | X | X |   |
| NEG | -        | 649.4426 | 12.53 | - | X | X | X |
| NEG | -        | 717.4297 | 12.53 | - | X | X |   |
| NEG | -        | 551.1824 | 12.53 | - | X | X |   |
| POS | 180.1516 | 163.1483 | 12.53 | - | X | X | X |
| POS | 164.1202 | 147.1169 | 12.53 | - | X | X | X |
| POS | 166.1354 | 149.1321 | 12.53 | - | X | X | X |
| POS | 672.3979 | 695.4205 | 12.53 | - | X | X |   |
| POS | 638.4222 | 621.4189 | 12.53 | - | X | X |   |
| POS | 370.1804 | 335.1666 | 12.53 | - | X | X |   |
| POS | 138.1029 | 121.0997 | 12.53 | - | X | X | X |
| POS | 136.0894 | 119.0861 | 12.53 | - | X | X | X |
| POS | 192.1530 | 175.1497 | 12.53 | - | X | X | X |
| POS | 206.1680 | 189.1647 | 12.53 | - | X | X | X |
| POS | 560.4787 | 561.4903 | 12.53 | - | X | X |   |
| POS | -        | 339.1645 | 12.53 | - | X |   | X |
| POS | -        | 137.1325 | 12.53 | - | X | X | X |
| POS | -        | 123.1169 | 12.53 | - | X | X | X |
| POS | -        | 336.1720 | 12.53 | - | X | X |   |
| POS | -        | 337.1692 | 12.53 | - | X | X |   |
| POS | -        | 461.1855 | 12.53 | - | X | X |   |
| POS | -        | 109.1018 | 12.53 | - | X | X |   |
| POS | -        | 320.1989 | 12.53 | - | X | X |   |

|     |          |          |       |   |   |   |   |   |
|-----|----------|----------|-------|---|---|---|---|---|
| POS | -        | 151.1490 | 12.53 | - | X |   | X | X |
| POS | -        | 221.2260 | 12.53 | - | X |   | X | X |
| POS | -        | 170.9962 | 12.53 | - | X |   | X |   |
| POS | -        | 81.0704  | 12.53 | - | X |   | X | X |
| POS | -        | 227.0389 | 12.53 | - | X |   | X |   |
| POS | -        | 239.0584 | 12.53 | - | X |   | X |   |
| POS | 550.4252 | 551.4325 | 12.75 | - | X |   | X |   |
| POS | -        | 271.2631 | 12.76 | - | X |   | X | X |
| NEG | -        | 281.2479 | 12.88 | - | X |   | X | X |
| NEG | -        | 349.2354 | 12.88 | - | X |   | X | X |
| NEG | -        | 411.2050 | 12.88 | - | X |   | X | X |
| POS | 264.2459 | 265.2520 | 12.88 | - | X |   | X |   |
| POS | 344.2297 | 327.2264 | 12.88 | - | X |   | X |   |
| POS | -        | 631.4667 | 12.88 | - | X |   | X |   |
| POS | -        | 395.2173 | 12.88 | - | X |   | X |   |
| POS | -        | 339.1848 | 12.88 | - | X |   | X |   |
| POS | -        | 389.1996 | 12.88 | - | X |   | X |   |
| POS | -        | 337.1821 | 12.88 | - | X |   | X |   |
| POS | -        | 321.2116 | 12.88 | - | X |   | X |   |
| POS | -        | 353.2368 | 12.88 | - | X |   | X | X |
| POS | 358.3089 | 381.2979 | 12.91 | - | X |   | X |   |
| POS | -        | 463.2017 | 12.91 | - | X |   | X |   |
| POS | -        | 378.7907 | 12.93 | - | X |   | X |   |
| POS | -        | 131.0031 | 12.93 | - | X |   | X |   |
| POS | -        | 299.1427 | 13.70 | - | X | X |   |   |
| POS | -        | 607.2530 | 13.70 | - | X | X |   |   |

---
