# Supplementary figures and images for: Mechanism of Chronic Kidney Disease Progression and Novel Biomarkers: A Metabolomic Analysis of Experimental Glomerulonephritis
Source: MDPI journal article supplement (doi:10.3390/metabo10040169), 2020-04-24

Figure S1.

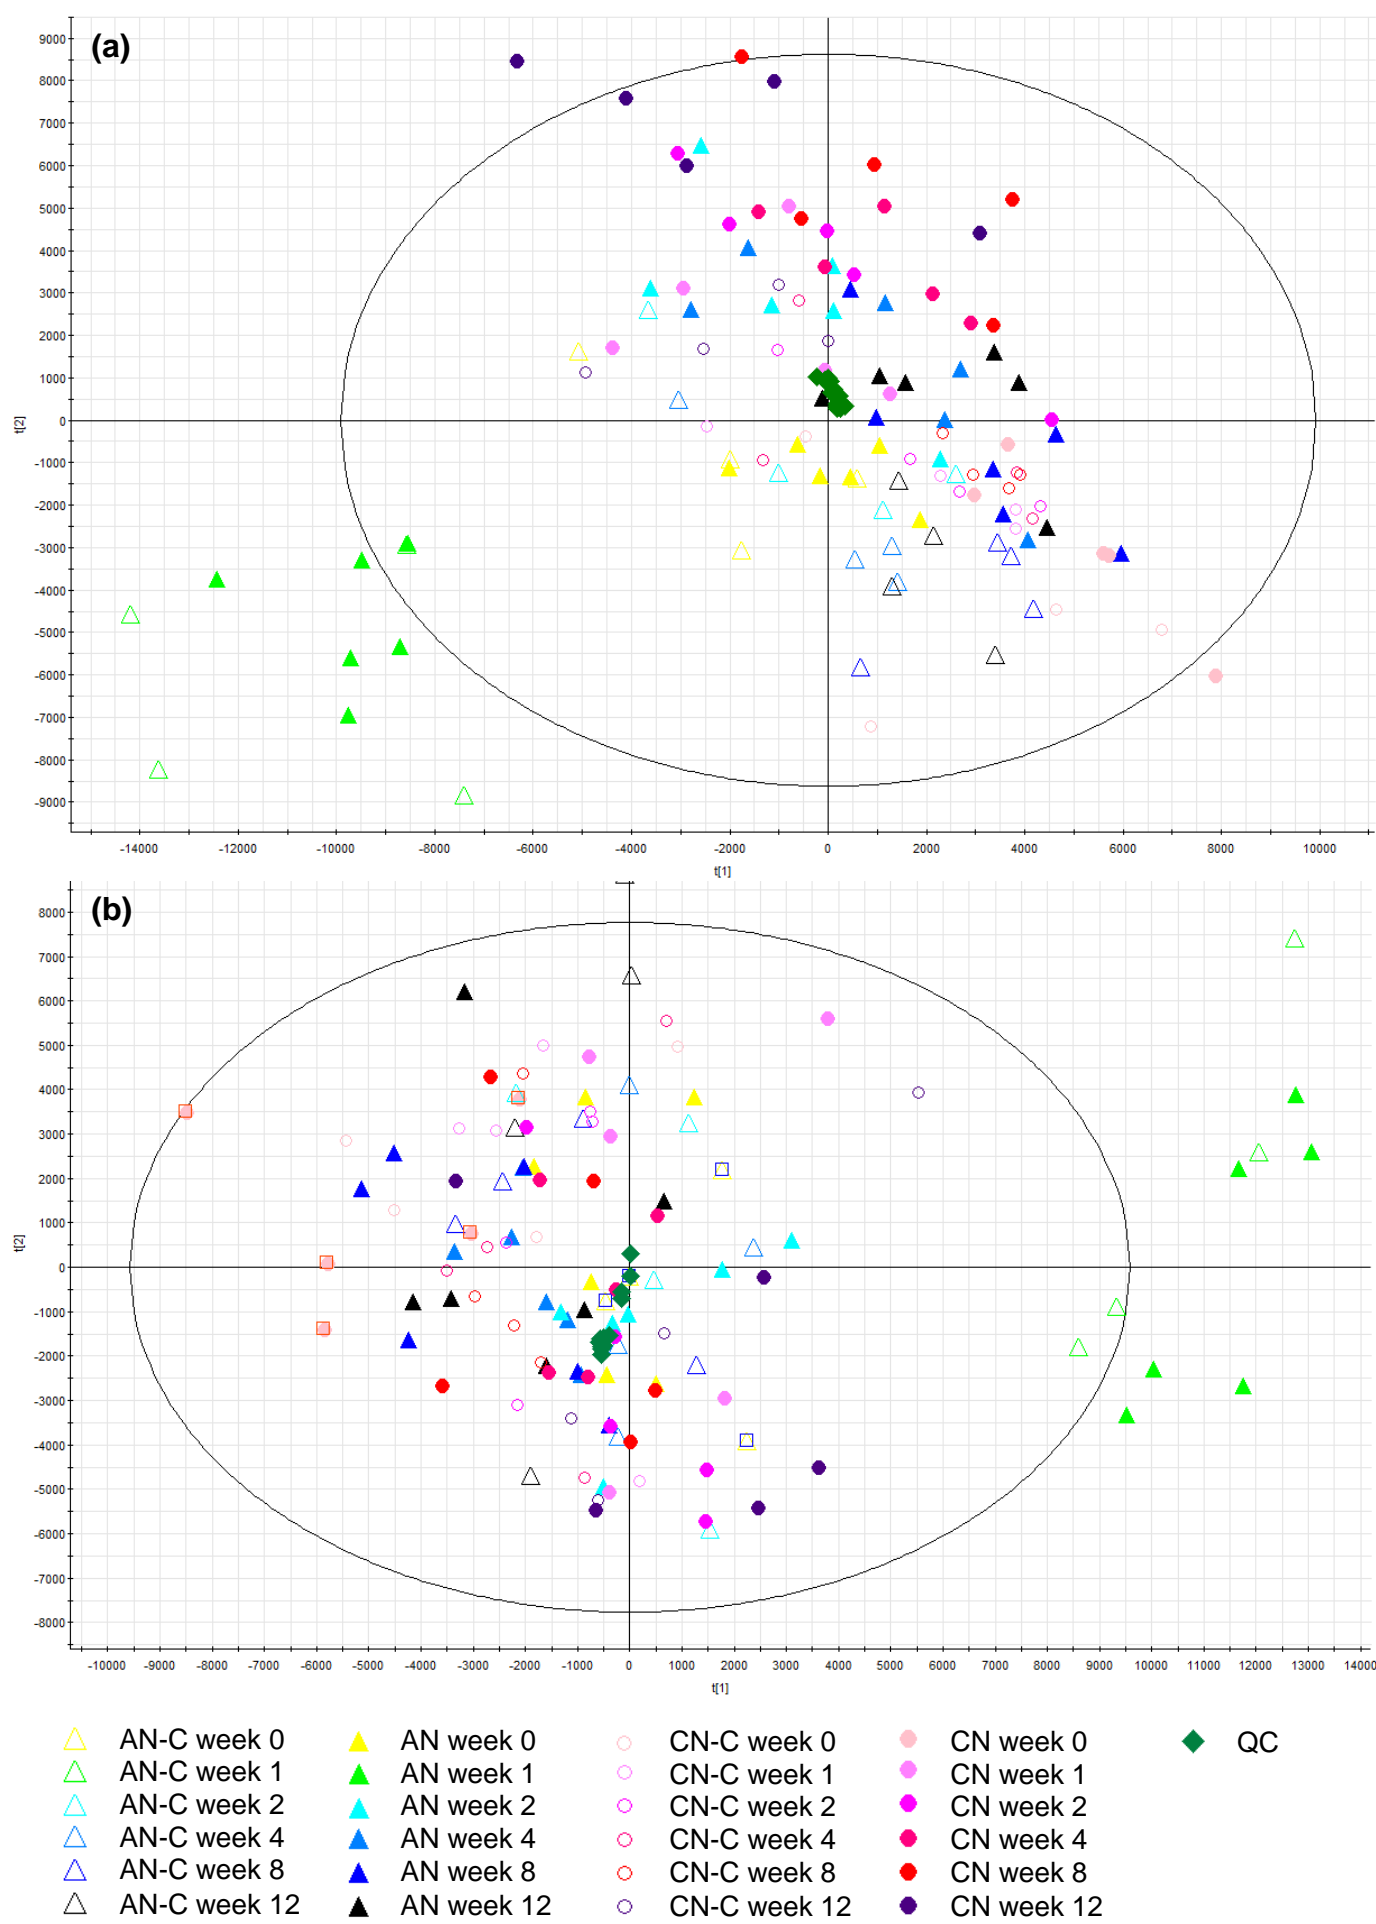

Supplement: s1 [file s1]
